# Supplementary material for: A synergetic enhancement strategy of light utilization and carrier transfer for UV photodetection associated with artificial resonance nano-cavities
Source: Royal Society of Chemistry journal article supplement (doi:10.1039/d3ta06308a), 2023-12-04
Supplement: d3ta06308a1.pdf [file d3ta06308a1.pdf]

## **Supporting Information**

# **A Synergetic Enhancement Strategy of Light Utilization and Carrier Transfer for UV Photodetection Associated with the Artificial Resonance Nano-Cavities**

Zhenpeng Cheng,<sup>a</sup> Zeping Li,<sup>a</sup> Ming-Yu Li,<sup>\*a</sup> Xiaoyan Wen,<sup>a</sup> Xumin Ding,<sup>b</sup> Hao Xu,<sup>c</sup> Jihoon Lee,<sup>d</sup> Haifei Lu<sup>\*a</sup> and Sisi Liu<sup>\*a</sup>

<sup>a</sup>School of Science, Wuhan University of Technology, Wuhan, 430070, China

<sup>b</sup>Advanced Microscopy and Instrumentation Research Center, School of Instrumentation Science and Engineering, Harbin Institute of Technology, Heilongjiang, 150001, China

<sup>c</sup>School of Physics, University of Electronic Science and Technology of China, Chengdu, 611731, China

<sup>d</sup>Department of Electronic Engineering, College of Electronics and Information, Kwangwoon University, Nowon-gu, Seoul 01897, Republic of Korea

\*Corresponding authors. E-mail: mingyuli.oliver@gmail.com (Ming-Yu Li), haifeilv@whut.edu.cn (Haifei Lu), liusisi0109@hotmail.com (Sisi Liu)

## Supplementary Figures and Tables

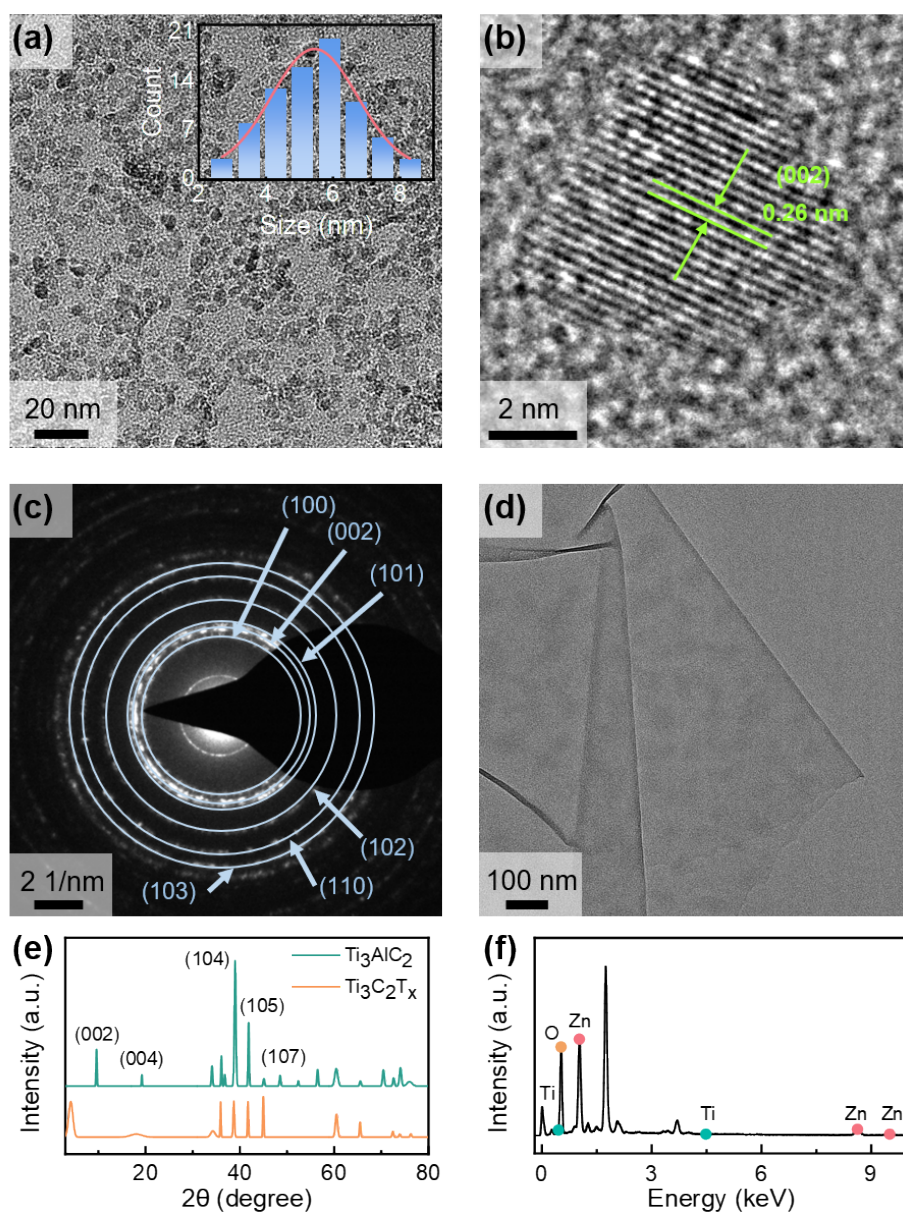

**Fig. S1.** (a) Transmission electron microscopy (TEM) image, (b) high-resolution transmission electron microscopy (HRTEM) image, and (c) selected area electron diffraction (SAED) patterns of ZnO quantum dots (QDs). (d) TEM image of MXene nanosheet. (e) X-ray diffraction (XRD) patterns of  $\text{Ti}_3\text{AlC}_2$  MAX and  $\text{Ti}_3\text{C}_2\text{T}_x$  MXene. (f) Elemental analysis of the 0D/2D composite thin film performed with energy-dispersive X-ray spectroscopy (EDS).

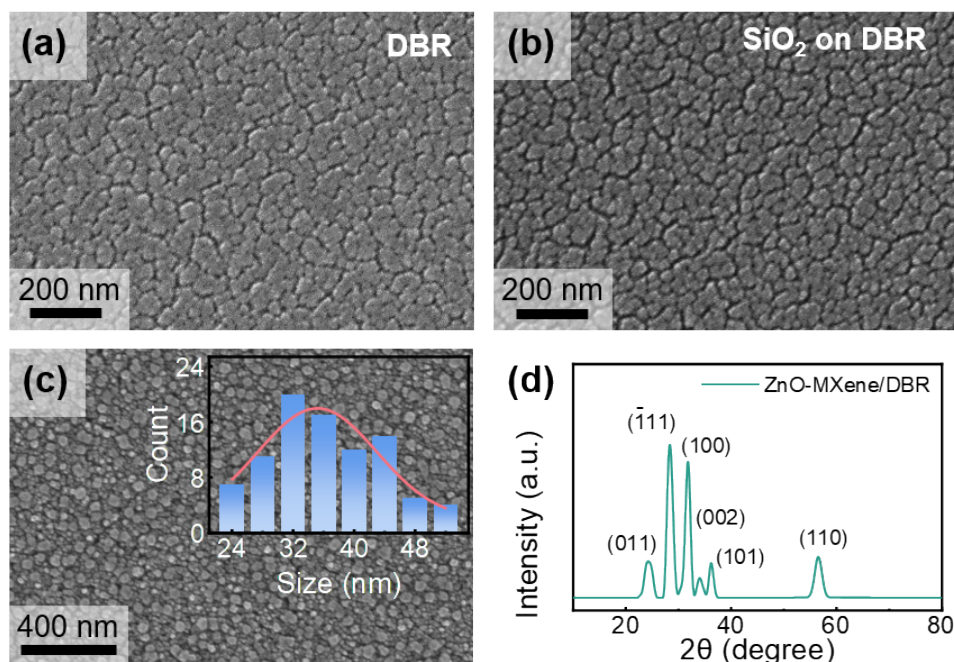

**Fig. S2.** Scanning electron microscopy (SEM) images of (a) DBR and (b) SiO<sub>2</sub> on DBR. (c) SEM image and (d) XRD patterns of the sample ZnO-MXene/DBR.

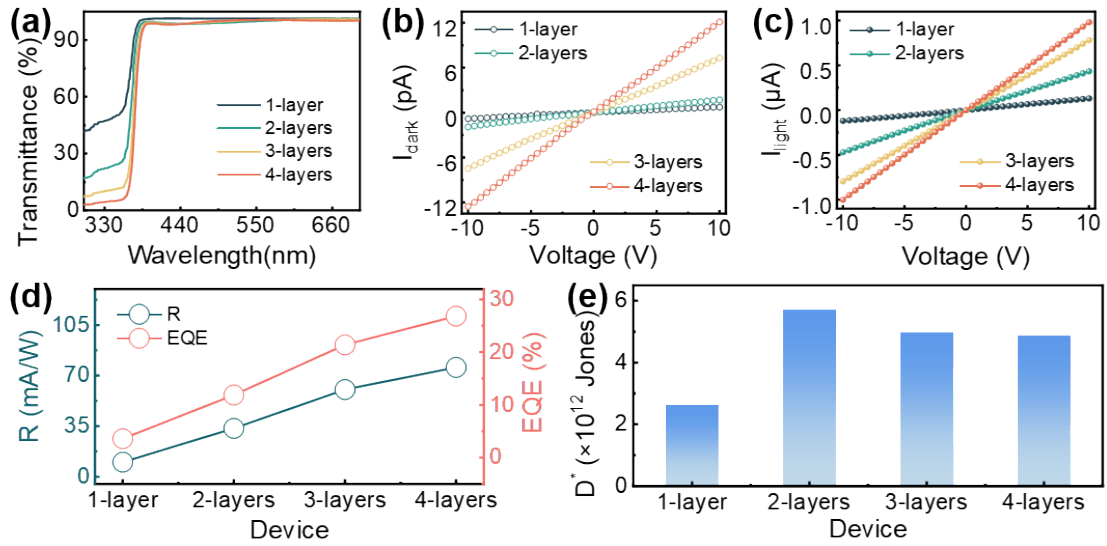

**Fig. S3.** (a) Transmittance spectra, (b) dark-current ( $I_{\text{dark}}$ ), (c) photocurrent ( $I_{\text{light}}$ ) of the devices with various layers of ZnO QDs. (d) Responsivity (R), external quantum efficiency (EQE), and **e** normalized detectivity ( $D^*$ ) of the devices.

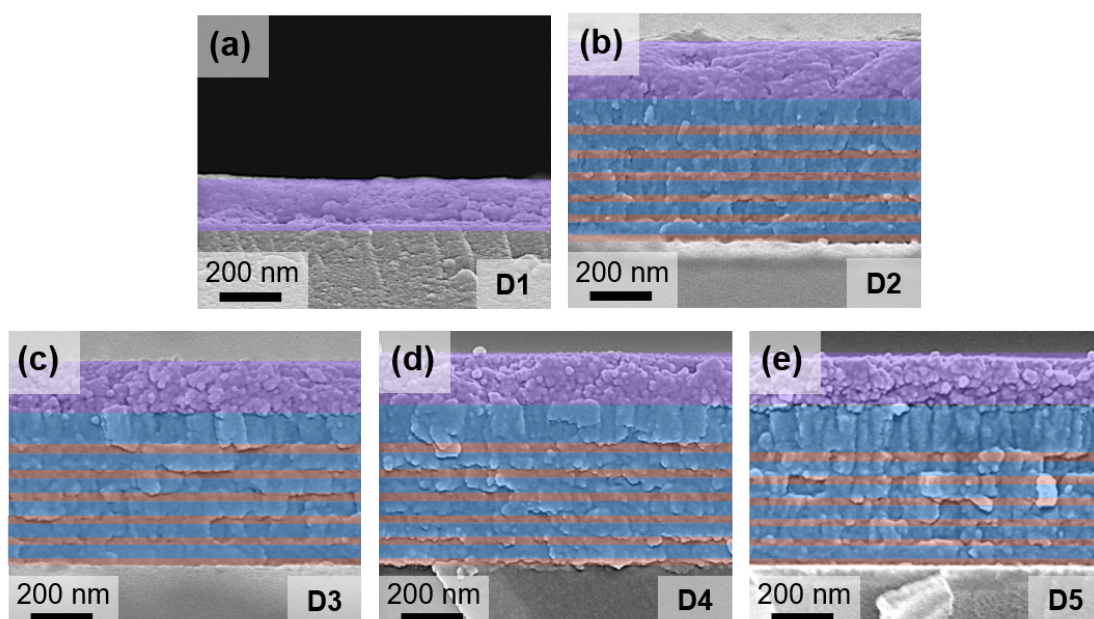

**Fig. S4.** Cross-sectional SEM images of the devices fabricated on (a) glass (D1) and on DBR with various thicknesses of SiO<sub>2</sub> isolating spacers: (b) 80 nm (D2), (c) 100 nm (D3), (d) 120 nm (D4), and (e) 140 nm (D5).

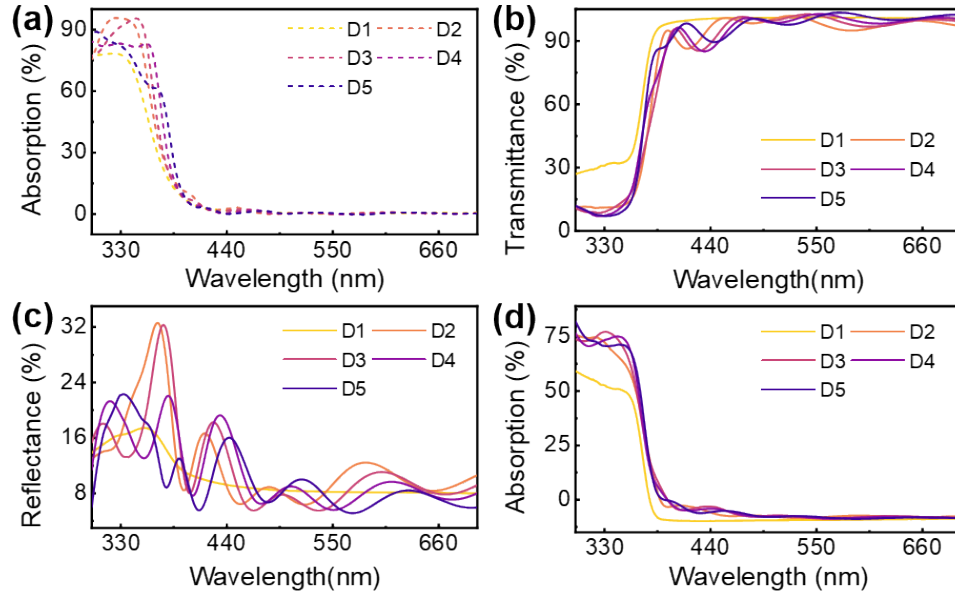

**Fig. S5.** (a) Simulated absorption spectra of the devices with various thicknesses of SiO<sub>2</sub> isolating spacers. (b) Transmittance, (c) reflectance, and (d) absorption spectra of the photodetectors.

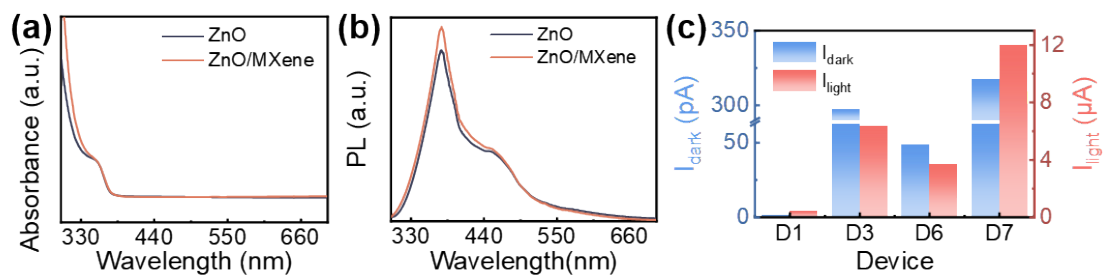

**Fig. S6.** (a) Absorbance and (b) photoluminescence (PL) spectra of ZnO QD and ZnO QD/MXene NS composite thin films. (c)  $I_{\text{dark}}$  and  $I_{\text{light}}$  of the devices at 10 V: ZnO/Glass (D1), ZnO/DBR (D3), ZnO-MXene/Glass (D6), and ZnO-MXene/DBR (D7).

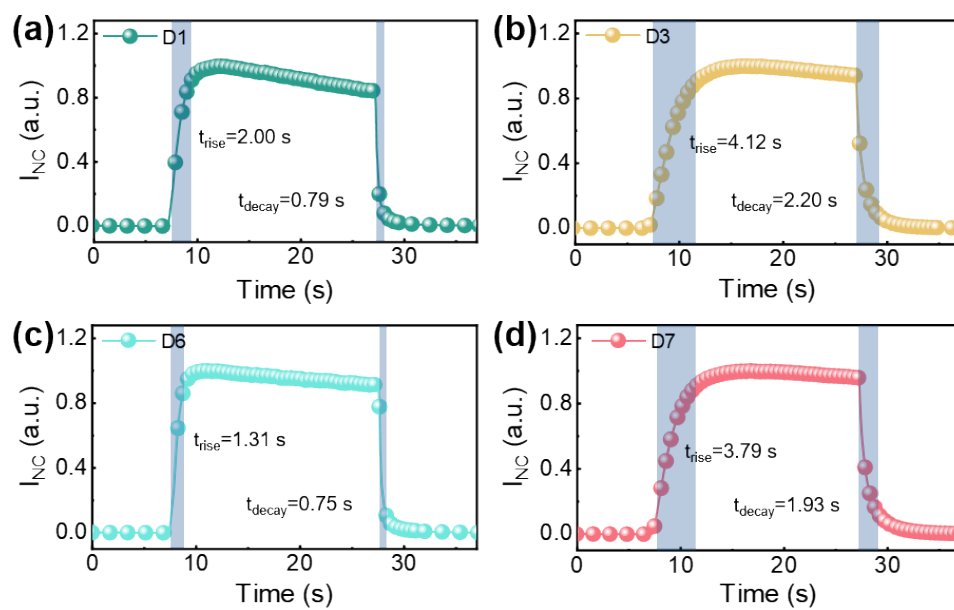

**Fig. S7.** Single period of the transient response of the photodetectors.



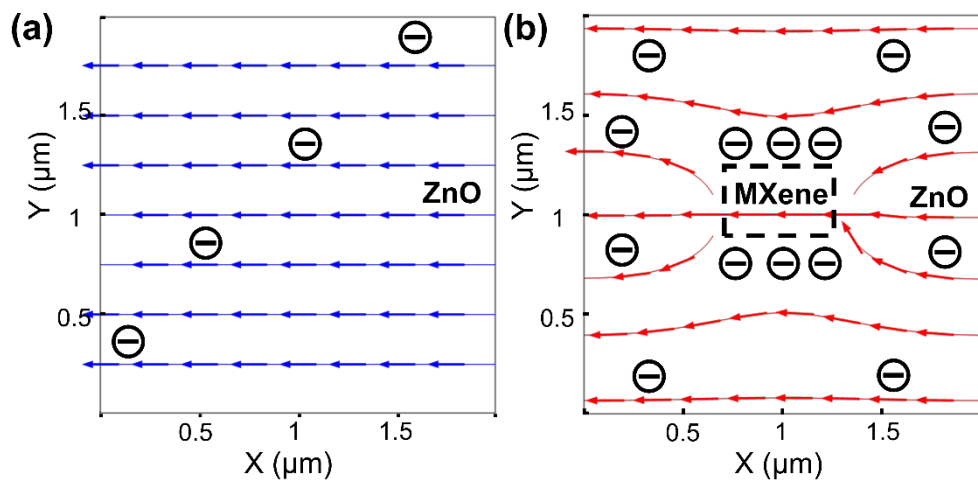

**Fig. S8.** Simulation of the current density distribution of (a) pristine ZnO and (b) ZnO QD/MXene NS nanocomposites.

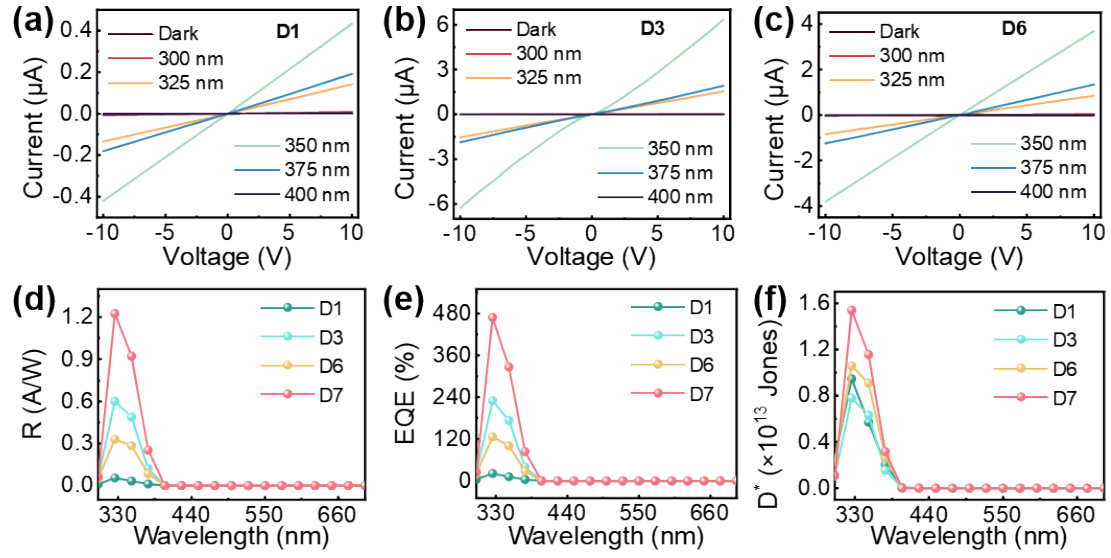

**Fig. S9.** (a) – (c) The I-V curves of the devices. The (d) R, (e) EQE, and (f)  $D^*$  of the photodetectors over a wavelength range between 300 and 700 nm.

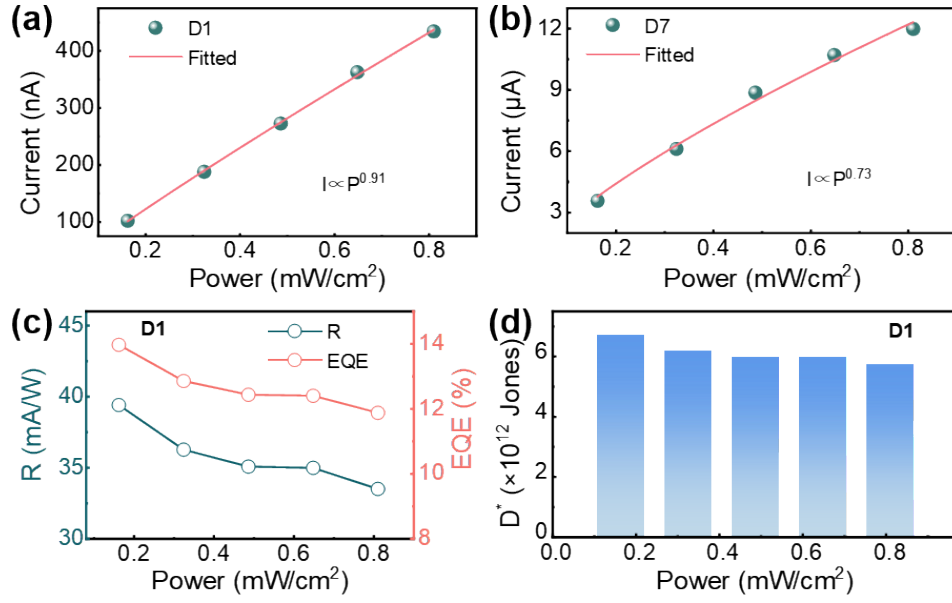

**Fig. S10.** Power law fitting curves of the device (a) D1 and (b) D7. The (c) R, EQE, and (d)  $D^*$  of the photodetector D1 with a variation of the light powers.

**Table S1.** Fitting coefficients and average lifetimes obtained from time-resolved photoluminescence (TRPL) spectra of the samples.

| Sample          | $A_1$ | $\tau_1$<br>(ns) | $A_2$ | $\tau_2$<br>(ns) | $\tau_{ave}$<br>(ns) |
|-----------------|-------|------------------|-------|------------------|----------------------|
| ZnO/Glass       | 0.40  | 0.42             | 0.61  | 0.99             | 0.87                 |
| ZnO-Mxene/Glass | 0.83  | 0.34             | 0.17  | 1.78             | 1.09                 |
| ZnO/DBR         | 1.03  | 0.71             | 0.09  | 45.73            | 38.94                |

**Table S2.** R, EQE, and D\* switching ratio (SR) of the devices with various layers of ZnO QDs.

| Layers of ZnO             | 1-layer             | 2-layers            | 3-layers            | 4-layers            |
|---------------------------|---------------------|---------------------|---------------------|---------------------|
| Transmittance at 350 nm   | 50.1%               | 24.3%               | 10.9%               | 4.7%                |
| R                         | 10.1                | 33.5                | 60.3                | 75.7                |
| (mA W <sup>-1</sup> )     |                     |                     |                     |                     |
| EQE                       | 3.6%                | 11.9%               | 21.4%               | 26.8%               |
| D*                        | 2.6                 | 5.7                 | 5.0                 | 4.9                 |
| (×10 <sup>12</sup> Jones) |                     |                     |                     |                     |
| SR                        | 1.8×10 <sup>5</sup> | 2.5×10 <sup>5</sup> | 1.1×10 <sup>5</sup> | 8.1×10 <sup>4</sup> |
